# Supplementary material for: Continuity of Care in Adults Aging with Cerebral Palsy and Spina Bifida: The Importance of Community Healthcare and Socioeconomic Context
Source: MDPI journal article supplement (doi:10.3390/disabilities3020019), 2023-06-12
Supplement: s1 [file s1]

**Supplementary Table S1.** International Classification of Diseases, 9th revision, Clinical Modification (ICD-9-CM) codes for cerebral palsy and spina bifida.

| Diagnosis Group       | ICD-9-CM Code |                                                       |
|-----------------------|---------------|-------------------------------------------------------|
| <b>Cerebral Palsy</b> | 3430          | Diplegic Infantile Cerebral Palsy                     |
|                       | 3431          | Hemiplegic Infantile Cerebral Palsy                   |
|                       | 3432          | Quadriplegic Infantile Cerebral Palsy                 |
|                       | 3433          | Monoplegic Infantile Cerebral Palsy                   |
|                       | 3434          | Infantile Hemiplegia                                  |
|                       | 3438          | Other Specified Infantile Cerebral Palsy              |
|                       | 3439          | Unspecified Infantile Cerebral Palsy                  |
|                       | 33371         | Athetoid Cerebral Palsy                               |
| <b>Spina Bifida</b>   | 74100         | Spina Bifida with Hydrocephalus Unspecified Region    |
|                       | 74101         | Spina Bifida with Hydrocephalus Cervical Region       |
|                       | 74102         | Spina Bifida with Hydrocephalus Dorsal Region         |
|                       | 74103         | Spina Bifida with Hydrocephalus Lumbar Region         |
|                       | 74190         | Spina Bifida without Hydrocephalus Unspecified Region |
|                       | 74191         | Spina Bifida without Hydrocephalus Unspecified Region |
|                       | 74192         | Spina Bifida without Hydrocephalus Unspecified Region |
|                       | 74193         | Spina Bifida without Hydrocephalus Unspecified        |

**Supplementary Table S2.** Typology used to create the combined indicator variable of spatial accessibility of Nurse Practitioners and Family Medicine physicians.

|  |               | Tertile of FM |               |               |
|--|---------------|---------------|---------------|---------------|
|  |               | <b>Low</b>    | <b>Medium</b> | <b>High</b>   |
|  | <b>Low</b>    | <i>Low</i>    | <i>Low</i>    | <i>Medium</i> |
|  | <b>Medium</b> | <i>Low</i>    | <i>Medium</i> | <i>High</i>   |
|  | <b>High</b>   | <i>Medium</i> | <i>High</i>   | <i>High</i>   |

Abbreviations: FM, Family Medicine; NP, Nurse Practitioner.

Tertiles for each provider type were created from the spatial accessibility of healthcare provider dataset [43].
